1 Language network connectivity increases in prodromal Alzheimer's disease

2  
3  
4 Pistono, A.<sup>a,d</sup>, Senoussi, M.<sup>d</sup>, Guerrier, L.<sup>b</sup>, Rafiq, M.<sup>c</sup>, Gimeno, M.<sup>a</sup>, Péran, P.<sup>b</sup>, Jucla, M.<sup>a</sup>,  
5 and Pariente, J.<sup>b,c</sup>  
6  
7

8 <sup>a</sup>Octogone-Lordat interdisciplinary research unit (EA 4156), University of Toulouse II-Jean  
9 Jaurès, Toulouse, France

10 <sup>b</sup>Toulouse NeuroImaging Center, Toulouse University, Inserm, UPS, France.

11 <sup>c</sup>Neurology Department, Neuroscience Centre, Toulouse University Hospital, Toulouse,  
12 France

13 <sup>d</sup>Ghent University, department of experimental psychology  
14  
15

16 Corresponding and first author:

17 Pistono Aurélie

18 Ghent University, Department of experimental psychology

19 aurelie.pistono@ugent.be

20 Henri Dunantlaan, 2

21 9000 Gent

22 Belgium  
23

24 **Abstract**

25 Language production deficits occur early in the course of Alzheimer's disease (AD); however,  
26 only few studies have focused on language functional networks in prodromal AD. The current  
27 study aims to uncover the extent of language alteration at a prodromal stage, on a behavioral,  
28 structural and functional level, using univariate and multivariate analyses. Twenty-four AD  
29 participants and 24 matched healthy controls underwent a comprehensive language evaluation,  
30 a structural T1-3D MRI and resting-state fMRI. We performed seed-based analyses, using the  
31 left inferior frontal gyrus and left posterior temporal gyrus as seeds. Then, we analyzed  
32 connectivity between executive control networks and language network in each group. Finally,  
33 we used multivariate pattern analyses to test whether the two groups could be distinguished  
34 based on the pattern of atrophy within the language network; atrophy within the executive  
35 control networks, as well as the pattern of functional connectivity within the language network;  
36 and functional connectivity within executive control networks. AD participants had language  
37 impairment during standardized language tasks and connected-speech production. Univariate  
38 analyses were not able to discriminate participants at this stage, while multivariate pattern  
39 analyses could significantly predict the group membership of prodromal patients and healthy  
40 controls, both when classifying atrophy patterns or connectivity patterns of the language  
41 network. Language functional networks could discriminate AD participants better than  
42 executive control networks. Most notably, they revealed an increased connectivity at a  
43 prodromal stage. Multivariate analyses represent a useful tool for investigating the functional  
44 and structural (re-)organization of the neural bases of language.

45

46 **Keywords:** language, connected speech, functional connectivity, fMRI, MVPA (multivariate  
47 pattern analysis), Alzheimer's disease

48

49 **Highlights**

50 Language network connectivity discriminates prodromal AD from healthy controls

51 Language network connectivity increases in prodromal AD

52 Atrophy patterns in the language network do not correlate with connectivity patterns in AD

53

54

## 55 1. Introduction

56

57 Language production deficits occur early in the course of Alzheimer's disease (AD). Most  
58 studies have shown impairment in fluency tasks and confrontation naming tasks (Taler and  
59 Phillips, 2008), usually attributed to lexical-semantic impairment (Joubert et al., 2010). These  
60 tasks have also been shown to accurately discriminate prodromal patients from healthy controls  
61 (Mueller et al., 2016; Taler and Phillips, 2008). Fewer studies have analyzed other language  
62 processes. Some studies have shown preserved syntactic abilities in early AD (Taler and  
63 Phillips, 2008), while others did not find such preservations (Kemper et al., 1993). Most studies  
64 have stressed the fact that phonological capacities are relatively preserved in early AD (Taler  
65 and Phillips, 2008). More and more studies have been focusing on connected speech  
66 production in AD, for the assessment of the functional use of language and cognition. They  
67 revealed several impairments in AD: reduced lexical content (Ahmed et al., 2013), increased  
68 word-finding difficulty and use of repetitions and self-corrections (de Lira et al., 2011), etc.  
69 While most studies focused on AD at a dementia stage, other studies revealed changes as early  
70 as the prodromal stage. Mueller et al. (2016) demonstrated that prodromal patients had lower  
71 lexical richness compared to healthy controls, but similar production of filled pauses (e.g.  
72 "hm"). Pistono et al. (2018) also showed that these patients produced more modalizing  
73 discourse, which refers to "discourse about discourse" (i.e. comments, feelings and uncertainty  
74 about the task).

75

76 Neuroimaging studies in AD patients have shown that language impairments are  
77 associated with atrophy or hypometabolism in the left inferior frontal gyrus (IFG) and temporal  
78 regions (e.g. Melrose et al., 2009). However, besides the alteration of isolated brain regions,  
79 the functional connectivity within brain networks can underlie the cognitive impairments or  
80 compensations observed. Resting-state functional connectivity is one of the current methods  
81 that allows functional brain networks to be investigated, including language functional network  
82 (e.g. Muller et al., 2016; Muller & Meyer, 2014). In AD, only few studies focused on this  
83 network, reporting lower functional connectivity in AD (Weiler et al., 2014, patients' mean  
84 MMSE: 18.86; Mascali et al., 2018, patients' mean MMSE: 20.5) and prodromal AD  
85 (Montembeault et al., 2019, patients' mean MMSE: 24.9) compared to healthy controls. These  
86 studies used the left IFG (Mascali et al., 2018; Montembeault et al., 2019) or left posterior

87 temporal gyrus (Mascali et al., 2018; Montembeault et al., 2019; Weiler et al., 2014) as a seed.  
88 They also showed that connectivity changes were only marginally correlated with AD  
89 participants' language performance (i.e. no significant correlations in Mascali et al., 2018, no  
90 correlations with IFG's connectivity map in Montembeault et al., 2019). However, it is possible  
91 that some changes remain unnoticed when focusing exclusively on the language network. For  
92 example, we now know that, in healthy aging, the language network interacts with the executive  
93 control network/attentional network to maintain a sufficient level of language performance  
94 (Hoffman & Morcom, 2018; Pistono et al., 2020). It is therefore possible that prodromal AD is  
95 primarily characterized by a loss of this compensation, rather than an alteration within the  
96 language network.

97         Second, univariate fMRI analyses may not be able to uncover the extent of changes  
98 occurring at a prodromal stage. Indeed, analysis of structural or functional MRI data is  
99 traditionally performed in a univariate manner, where each voxel or area in the brain is  
100 separately tested for a condition of interest. By contrast, multivariate pattern analyses (MVPA)  
101 simultaneously consider patterns of information (i.e. atrophy or BOLD signal), leveraging the  
102 multivariate, i.e. multi-voxel, and distributed nature of neural representations (Haynes and  
103 Rees, 2006). In other words, while univariate analyses ask to what degree each voxel's activity  
104 is affected by a particular condition, MVPA examines whether, by contrast, an experimental  
105 manipulation or a clinical population can be predicted based on the pattern of activity across a  
106 set of voxels. Using multivariate patterns of activity, i.e. activity across multiple voxels, can  
107 increase sensitivity in differentiating between individuals or conditions (Haynes & Rees, 2006;  
108 but see Hebart & Baker (2018) for a discussion on the benefits and pitfalls of MVPA as  
109 compared with classical univariate analyses). Regarding Alzheimer's disease, Liu et al., (2018)  
110 applied MVPA to investigate the topologic alterations of resting-state functional connectivity  
111 in participants with subjective cognitive decline, prodromal AD and AD compared with healthy  
112 individuals. They showed that by using MVPA, it was possible to predict whether a participant  
113 belonged to one of the three clinical groups or to the healthy control group, which indicated  
114 that patterns of resting-state data are already discriminant for cognitive decline and prodromal  
115 AD. Further work is required to understand how these changes relate to patients' cognitive  
116 impairment.

117

118         In the current study, we focus on language processing to uncover the extent of language  
119 alteration at a prodromal stage on a behavioral, structural and functional level, using univariate  
120 and multivariate analyses. Additionally, we will examine whether structural and functional

121 changes are correlated with language performance, using both standardized and connected  
122 speech tasks. Regarding language performance, we expect behavioral inter-group differences  
123 for both the standardized language tasks and discourse task, in line with current literature on  
124 prodromal AD (e.g. Mueller et al., 2016). Regarding functional connectivity, we will first  
125 analyze language networks using the same method as previous literature on AD, and the same  
126 two seeds: left IFG and left posterior temporal gyrus (e.g. Mascali et al., 2018). We anticipate  
127 marginal inter-group differences with this analysis. We will then analyze connectivity between  
128 executive control networks and language network. We expect lower between-network  
129 connectivity in prodromal AD participants, correlated with lower language performance.  
130 Finally, we will use MVPA to test whether it is possible to distinguish the two groups based on  
131 (i) the pattern of atrophy within the language network, (ii) atrophy within the executive control  
132 networks, as well as (iii) the pattern of functional connectivity within the language network and  
133 (iv) functional connectivity within executive control networks (using atlases from Shirer et al.,  
134 2012). Based on previous studies showing that functional connectivity is affected in prodromal  
135 AD, we predict that both structural and functional information will allow to discriminate AD  
136 participants from healthy controls using MVPA. We also hypothesize that functional changes  
137 within both language and executive control networks will be related to language performance.  
138 In particular, lower lexical performance (i.e. naming and fluency tasks) and lexical content  
139 during connected speech production will be correlated with functional connectivity alteration  
140 in the AD group.

141

## 142 2. Material and Methods

143

### 144 2.1. Participants

145 Participants were right-handed and native French speakers with no history of neurological or  
146 psychiatric problems. In order to avoid possible reorganization of the language network due to  
147 multilingualism, we only included speakers that did not have a good command and/or a frequent  
148 use of a language other than French. All the participants provided written, informed consent  
149 before participating in the study and received monetary compensation for their participation.  
150 The current study was approved by the ethics committee (IDRCB: 2015-A01416-43).

151 AD participants were selected if they presented with a memory complaint and had no  
152 concomitant history of neurological or psychiatric disease. They underwent the following pre-  
153 inclusion assessment:

- 154 - Autonomy in daily living (Instrumental Activities of Daily Living (IADL), Graf, 2008);
- 155 - Global cognition (Mini-Mental State Evaluation (MMSE));
- 156 - Anterograde verbal memory (Free and Cued Selective Reminding Test (FCSRT, Van  
157 der Linden et al., 2004)).
- 158 - Amyloid assessment with cerebrospinal fluid (CSF) analysis by lumbar puncture: CSF  
159 biomarker levels of total tau (T-Tau), phospho-tau (P-Tau), Ab42 and Ab40 were  
160 measured using an ELISA method (Innogenetics, Ghent, Belgium). Innotest Amyloid  
161 Tau Index (IATI) was calculated.  $P\text{-Tau} \geq 60$  pg/ml and  $IATI \leq 0.8$  were deemed to be  
162 suggestive of AD. In case of an ambiguous profile ( $P\text{-Tau} < 60$  pg/ml or  $IATI > 0.8$ ),  
163 we calculated the Ab42/Ab40 ratio and a score  $< 0.045$  was considered to be compatible  
164 with a diagnosis of AD.

165 Individuals with AD were included if they met the following criteria:  $MMSE \geq 24$ ;  $IADL < 1$   
166 and based on the IWG-2 criteria (Dubois et al., 2014): evidence of a gradual and progressive  
167 change in memory function reported by patient or informant for more than 6 months and  
168 demonstrated by an episodic memory test, and CSF evidence of AD.

169 Matched healthy control participants underwent the same pre-inclusion neuropsychological  
170 assessment as the AD group. They were included if they had no memory complaint and no  
171 history of neurological or psychiatric disease and a  $MMSE \geq 27$ . They were excluded if they  
172 presented with cognitive impairment (test scores  $< -1.5$  SDs) during the pre- or post-inclusion  
173 neuropsychological assessment.

174

## 175 2.2. Cognitive evaluation

176

### 177 2.2.1. Neuropsychological assessment

178 All participants also underwent a comprehensive neuropsychological assessment. Visual  
179 recognition memory was assessed with the Doors and People test (Baddeley et al., 1994). Short-  
180 term memory and working memory were evaluated with the WAIS-III Digit Span and  
181 Backward Digit Span subtest (Wechsler, 1997). Cognitive flexibility was assessed with the  
182 Trail Making Test (TMT, Reitan, 1958). Praxis was explored with Mahieux's assessment

183 (Mahieux-Laurent et al., 2008) and gnosis with the Visual Gnosis Evaluation Protocol (VGEP,  
184 Agniel, Joannette, Doyon, & Duchéin, 1992). Apathy and depression were also measured, using  
185 the Starkstein scale (Starkstein et al., 1992) and the Beck Depression Inventory (Beck et al.,  
186 1961).

187

### 188 2.2.2. Language assessment

189 Language was assessed with the GREMOTs assessment (Bézy et al., 2016). GREMOTs is a  
190 computerized battery of language tests that evaluates both oral and written language as well as  
191 production and comprehension at different levels (i.e. phonological processing, lexical  
192 processing and syntactic processing).

193

194 This battery includes a connected-speech task, which we analyzed more specifically. With  
195 regards to the procedure for this task, the participants were given the same instructions: “This  
196 is a story depicted in 5 pictures. Tell me the story with as many details as possible.” During the  
197 task, the experimenter remained neutral and avoided speaking in order to ensure uniform  
198 conditions for discourse production. The oral productions of participants were recorded and  
199 manually and orthographically transcribed. The following variables were used to analyze the  
200 discourse of both the AD group and the cognitively normal controls:

- 201 - Total number of words in the narrative;
- 202 - Lexical content: proportion of closed class and open class words (i.e. nouns, most verbs,  
203 adjectives, numerals and adverbs of manner). Standardized indexes were calculated  
204 according to the following formula:  $(\text{Open class} - \text{Closed class}) / (\text{Open class} + \text{Closed class})$ , similarly to Pistono et al., (2019);
- 205
- 206 - Proportion of self-corrections: number of self-corrections normalized per 100 words  
207 (e.g. when the speaker stops and resumes with a substitution for a word or a new  
208 utterance);
- 209 - Proportion of repetitions: number of repetitions (of sounds, syllables, words or partial  
210 phrases) normalized per 100 words;
- 211 - Proportion of filled pauses: number of filled pauses (e.g. “*hm*,” “*um*,” “*pff*”) normalized  
212 per 100 words;
- 213 - Proportion of modalizing discourse: number of words that are part of a modalizing  
214 utterance, normalized per 100 words (e.g. “*It seems that*”; “*I don’t know how to say it*”;  
215 etc.).

216



217 Intergroup comparisons for the neuropsychological assessment and the language assessment  
218 were performed using Student's t-test for independent samples. Bonferroni-Holm corrections  
219 for multiple comparisons were applied.

220

## 221 2.3. Structural and functional MRI

222

### 223 2.3.1. MRI Acquisition

224 MRI scans were performed for all participants using a 3-T imager (Philips Achieva dStream,  
225 Inserm/UPS UMR1214 ToNIC Technical Platform, Toulouse, France). A 3D-T1 image was  
226 acquired for anatomical reference with the following parameters: TR = 8 ms, TE = 3.7 ms, flip  
227 angle = 8°, matrix size = 256 x 256 mm, 170 slices, voxel size= 0.9 mm x 0.9 mm x 1 mm, slice  
228 thickness = 1 mm. Whole-brain resting-state fMRI images were obtained with the following  
229 parameters: TR = 2837 ms, TE = 40 ms, flip angle = 90°, 46 interleaved acquisition, slice  
230 thickness = 3 mm, matrix size = 80 x 80 mm, 200 volumes, total scan time 10 min. During  
231 scanning, participants were instructed to keep their eyes closed but to stay awake and avoid  
232 thinking of anything in particular. All participants affirmed that they were fully awake during  
233 the 10 minutes of the scanning.

234

### 235 2.3.2. Preprocessing

236 The data were analyzed using the Conn toolbox (Version 18b, Whitfield-Gabrieli & Nieto-  
237 Castanon, 2012), implemented in MATLAB. The preprocessing pipeline of the functional  
238 images included: functional realignment and unwarp, slice-timing correction, outlier  
239 identification, normalization to the MNI template, and smoothing with a Gaussian kernel of 6  
240 mm. This step created a scrubbing covariate (containing the potential outliers scans for each  
241 participant) and a realignment covariate (containing the six head motion parameters). Average  
242 realignment ( $t(46)=0.97, p=0.17$ ) and maximum realignment ( $t(46)=1.16, p=0.13$ ) did not  
243 significantly differ between the two groups. Then, the six head motion parameters plus their  
244 associated first-order derivatives, the identified outliers scans, white matter and cerebrospinal  
245 fluid signals and the effect of rest were removed by means of the CompCor method. The  
246 resulting preprocessed images were band-pass filtered (0.01 Hz–0.1 Hz) to remove  
247 physiological high-frequency noise (e.g. cardiac and respiratory fluctuations). Atlases were  
248 then masked with the participant's gray matter mask. With this method, each ROI was restricted  
249 to voxels belonging to an estimated gray matter mask derived from the T1 segmentation.

250

### 251 2.3.3. Voxel based morphometry (VBM)

252 Gray matter density was assessed using a voxel-based morphometry method on Statistical  
253 Parametric Mapping version 12 (SPM 12, Wellcome Trust Centre for Neuroimaging). For each  
254 participant, the 3D-T1 sequence was segmented to isolate gray matter and white matter  
255 partitions, modulated for deformation, normalized to the MNI space and smoothed ( $8 \times 8 \times 8$   
256 mm). Inter-group comparisons were then performed (voxel level  $p < 0.05$ , FWE-corrected,  
257 cluster=50 voxels).

258

### 259 2.3.4. Seed-based analyses

260 The left Inferior frontal gyrus (LIFG) and the left posterior temporal gyrus (LSTG, including  
261 parts of the left middle/superior/supramarginal gyrus) were used as seeds, based on Shirer's  
262 functional atlas of language (Shirer et al., 2012). Correlation maps were constructed by  
263 correlating the average BOLD-signal dynamic of the region of interest with the BOLD-signal  
264 of every other single voxel. To enforce a Gaussian distribution of the correlation data, Pearson's  
265 correlation coefficients were then transformed to z-scores using the Fisher  $r$  to  $z$  transformation  
266 for subsequent t-tests. These individual z values maps were entered into a one-sample t-test to  
267 determine the functional network correlated with spontaneous activity of the seed region within  
268 each group ( $p < 0.05$  FWE at the cluster level). We then performed two-sample t-tests to detect  
269 inter-group differences. The threshold for second-level maps was set at  $p < 0.05$  FWE at the  
270 cluster level.

271

### 272 2.3.5. Within- and between-network connectivity

273 To measure within-network and between-networks connectivity, we selected networks from  
274 Shirer's atlas (2012): language network, left executive control network (left ECN), right  
275 executive control network (right ECN).

276 The language network includes 7 ROIs within the left IFG, right IFG, left middle temporal  
277 gyrus, left middle/angular gyrus, left middle/superior/supramarginal gyrus, right  
278 middle/superior/ supramarginal gyrus, left thalamus and left cerebellum. The left ECN includes  
279 6 ROIs within the left middle frontal/superior frontal gyrus, left IFG/orbitofrontal gyrus, left  
280 superior/inferior parietal/precuneus/angular gyrus, right cerebellum and left thalamus. The right  
281 ECN includes 6 ROIs as well: the right middle frontal/superior frontal gyrus, right middle  
282 frontal gyrus, right superior frontal gyrus, right inferior parietal/supramarginal/angular gyrus,  
283 left cerebellum and right caudate.

284 Within- and between-network connectivity (average for all the ROIs within each network) was  
285 evaluated for each participant. More precisely, within-network connectivity is a mean  
286 composite network connectivity estimate, calculated by means of pairwise correlations between  
287 all the regions comprising an individual network. Between-network connectivity is the result  
288 of pairwise correlations between the regions in each pair of different networks. Averages of  
289 within- and between-network connectivity were compared between groups with one-tailed t-  
290 tests to assess whether healthy controls present greater within- and between-network  
291 connectivity than AD participants.

292

### 293 2.3.6. Multivariate pattern analyses

294 To investigate whether the two groups could be identified based on the pattern of atrophy or  
295 connectivity within the language network and the ECN networks, we performed multivariate  
296 pattern classification.

297 Supervised classification analyses, performed using a classifier algorithm, consist in  
298 training a classifier to distinguish two or more classes of data (e.g. class 1: healthy controls  
299 (HC), class 2: patients (AD)) from a set of training samples by providing the corresponding  
300 labels of each sample, e.g. “healthy control” or “patient.” Following this training phase, the  
301 classifier is then tested on a test dataset composed of samples not used during the training phase,  
302 in order to assess whether the classifier is able to generalize to new unseen data. If the classifier  
303 is able to predict the class of novel samples in the test dataset, i.e. accurate prediction, it  
304 indicates that the multivariate pattern of information is informative about the classes of interest.  
305 To ensure unbiased evaluation of classification performance, this procedure is repeated over  
306 multiple independent divisions of the entire dataset into training and test datasets, i.e. cross-  
307 validation. The accuracy of classifier predictions, i.e. 0 for incorrect and 1 for correct, are then  
308 averaged across cross-validation folds to obtain a classification score between 0 and 1 (or 0%  
309 and 100%) that can be compared to chance level. For our analyses, there was always 2 classes,  
310 corresponding to the healthy control or patient groups, therefore chance level was  $1/2 = 50\%$ .

311 *Features selection.* Classifiers are sensitive to the ratio between the number of variables,  
312 e.g. voxels, and number of samples, i.e. the different data samples provided, which can cause  
313 overfitting and/or poor classification accuracy (Pereira et al., 2009). One method to prevent this  
314 is to perform the analysis on specific ROIs based on anatomical or functional data (Pereira et  
315 al., 2009). Doing so decreases the number of voxels used by the classifier and focuses on  
316 appropriate regions that allow for best discrimination. We therefore extracted ROIs from the  
317 Shirer’s atlas (Shirer et al., 2012) of language network (7 ROIs), left ECN (6 ROIs) and right

318 ECN (6 ROIs) to perform 6 classifications: gray matter density within areas of each of these  
319 three networks, as well as functional connectivity between areas of each of these three  
320 networks. To extract each participant's gray matter density within each ROI, we performed a  
321 one sample t-test (using SPM12) using each network as an inclusive mask. To extract individual  
322 connectivity values between each ROI of the networks under study, we performed a one sample  
323 t-test within each network, using the Conn toolbox.

324 *Classification procedure.* We used a linear discriminant analysis (LDA) classifier  
325 implemented in the Scikit-learn toolbox (Pedregosa et al., 2011). More precisely, we trained  
326 the LDA classifier to distinguish the two classes of data, i.e. "healthy controls" versus  
327 "patients." The classification was performed in a leave-one-out cross-validation approach. In  
328 each cross-validation fold, the classifier was trained on data from all but one participant and  
329 used on the left-out participant to predict its class membership. This procedure was repeated  
330 until each trial's class had been used as a test.

331 *Permutation test.* To evaluate the significance of classification accuracies, for each  
332 analysis, we computed permutation tests. In order to estimate the null distribution of  
333 classification accuracy, we randomly permuted the labels of all samples (i.e. HC or AD) and  
334 performed the classification analysis 100,000 times, yielding 100,000 surrogate classification  
335 accuracies under the null hypothesis that the two classes are completely interchangeable. From  
336 these surrogate distributions, we computed the probability of observing a certain classification  
337 accuracy, i.e. p-value.

338 *Feature contribution.* For each classification, we extracted each feature contribution by  
339 using a method that allows an "informativity" measure to be extracted from classifier weights  
340 (Haufe et al., 2014). Indeed, classifier weights cannot be interpreted, as they reflect both noise  
341 and signal in the data; we thus used this approach to evaluate the extent to which a certain  
342 feature was informative in performing the classification. For each classification, the  
343 contribution value of each feature was calculated. Furthermore, a null distribution of each  
344 feature's contribution was computed using the permutation procedure described above to  
345 estimate the significance of the contribution values.

346

### 347 2.3.7. Correlations between functional connectivity and language performance

348 For the different functional analyses (i.e. seed-based, between-network connectivity, MVPA),  
349 significant inter-group differences were further examined through intra-group correlations. To  
350 do so, we chose the most sensitive variables during the language assessment (object naming,  
351 famous face naming, word spelling, written semantic verification, sentence spelling and text

352 comprehension) and the narrative task (lexical content, modalizing discourse, self-corrections).  
353 We performed Kendall correlations and then applied Bonferroni-Holm corrections.

354  
355

### 356 3. Results

357  
358 3.1. Population

359 Twenty-four AD participants and 24 healthy controls were recruited. Both groups were matched  
360 for age (AD group: 72.9±8 years old; HC group: 70±4 years old, p=0.09), gender (AD group:  
361 13 women; HC group: 11 women) and level of education (years of education, AD group:  
362 12.5±4; HC group: 12.4±4, p=0.9).

363 During the pre-inclusion assessment, patients had a lower MMSE (AD group: 25.5±2.6; HC  
364 group: 29±1, p<0.0001) and lower performance during the FCSRT than the control group (sum  
365 three free recalls AD group: 14.17±9.69; HC group: 32.29±4.79, p<0.0001; sum three cued  
366 recalls AD group: 30.33±12; HC group: 46.42±1.93, p<0.0001).

367

#### 368 3.1.1. Neuropsychological assessment

369 During the post-inclusion assessment, AD participants' performance on the Doors and People  
370 test, digit span forward and Trail Making Test was also lower than that of the control group, as  
371 shown in Table 1.

372

|                                     | <b>Healthy<br/>Controls</b> | <b>AD<br/>participants</b> | <b>p value</b>    | <b>Cohen's<br/>d</b> |
|-------------------------------------|-----------------------------|----------------------------|-------------------|----------------------|
| <b>Doors and People test, set A</b> | 10.78±1.38                  | 8.00±2.55                  | <b>&lt;0.0001</b> | <b>1.36</b>          |
| <b>Digit span forward</b>           | 6.00±1.00                   | 5.21±0.98                  | <b>0.009</b>      | <b>0.80</b>          |
| <b>Digit span backward</b>          | 4.83±1.40                   | 4.04±0.91                  | 0.027             | -                    |
| <b>Trail Making Test, A</b>         | 38.79±12.50                 | 51±16.41                   | <b>0.006</b>      | <b>0.83</b>          |
| <b>Trail Making Test, B-A</b>       | 55.13±27.86                 | 114.22±81.83               | <b>0.002</b>      | <b>0.97</b>          |
| <b>VGEP</b>                         | 35.26±1.10                  | 33.79±2.87                 | 0.026             | -                    |
| <b>Beck</b>                         | 2.58±2.21                   | 3.29±3.28                  | 0.384             | -                    |

|                   |           |            |       |   |
|-------------------|-----------|------------|-------|---|
| <b>Starkstein</b> | 9.50±4.19 | 11.78±4.60 | 0.082 | - |
|-------------------|-----------|------------|-------|---|

373 Table 1. Performance during the neuropsychological assessment. Results represent mean±SD.  
 374 Results that are significant after Bonferroni-Holm correction are in bold. Cohen's d values were  
 375 measured for these variables only.

376

377

### 378 3.1.2. Brain atrophy

379 AD participants had significant atrophy in two clusters compared to the control group (see  
 380 Appendix), with one cluster encompassing the left hippocampus, parahippocampus and  
 381 thalamus (K voxels=3278; t=7.28; pFWE-corr<0.0), and one cluster involving the contralateral  
 382 areas (K voxels=1076; t=7.40; pFWE-corr<0.05).

383

384

### 385 3.2. Language evaluation

386

#### 387 3.2.1. Standardized assessment

388 AD participants had lower performance during several lexical tasks, as well as syntactic tasks.  
 389 Results are detailed in Table 2.

390

|                                                              | <b>Healthy<br/>Controls</b> | <b>AD<br/>participants</b> | <b>p value</b>    | <b>Cohen's<br/>d</b> |
|--------------------------------------------------------------|-----------------------------|----------------------------|-------------------|----------------------|
| Repetition, words (/10)                                      | 9.38±1.01                   | 9.17±1.05                  | 0.488             | -                    |
| Grammatical fluency<br>(category: verbs)                     | 35.21±11.66                 | 27.08±11.23                | 0.018             | -                    |
| Semantic fluency<br>(category: fruits)                       | 19.33±3.38                  | 15.04±6.03                 | 0.004             | -                    |
| <b>Lexical<br/>processing</b> Phonemic fluency<br>(letter V) | 17.29±6.12                  | 17±8.01                    | 0.888             | -                    |
| Object naming (/36)                                          | 34.7±1.40                   | 32.63±1.91                 | <b>&lt;0.0001</b> | <b>1.23</b>          |
| Action naming (/36)                                          | 33.13±3.25                  | 31.13±2.8                  | 0.028             | -                    |
| Famous face naming<br>(/10)                                  | 8.75±1.15                   | 4.83±2.78                  | <b>&lt;0.0001</b> | <b>1.84</b>          |
| Reading, words (/30)                                         | 29.71±.55                   | 29.33±.92                  | 0.092             | -                    |

|                                |                                      |            |             |                   |             |
|--------------------------------|--------------------------------------|------------|-------------|-------------------|-------------|
|                                | Spelling, words (/12)                | 11.58±.504 | 10.04±1.33  | <b>&lt;0.001</b>  | <b>1.53</b> |
|                                | Oral semantic verification (/18)     | 17.04±1.27 | 15.96±1.6À  | 0.013             | -           |
|                                | Written semantic verification (/18)  | 16.3±1.69  | 14±2.21     | <b>&lt;0.001</b>  | <b>1.17</b> |
| <b>Syntactic processing</b>    | Repetition, sentences (/4)           | 3.46±.78   | 3.42±.65    | 0.842             | -           |
|                                | Order execution (/6)                 | 5.96±.20   | 5.79±.42    | 0.084             | -           |
|                                | Sentence production (/6)             | 5.75±.68   | 5.25±.94    | 0.040             | -           |
|                                | Syntactic comprehension (/24)        | 21.25±2.51 | 18.92±3.62  | 0.013             | -           |
|                                | Spelling, sentence (/27)             | 25.83±1.05 | 24.25±1.98  | <b>0.001</b>      | <b>1.00</b> |
|                                | Text comprehension (time in seconds) | 49.3±15.73 | 80.88±30.51 | <b>&lt;0.0001</b> | <b>1.30</b> |
|                                | Repetitions, non-words (/6)          | 5.54±.66   | 5.08±.93    | 0.055             | -           |
| <b>Phonological processing</b> | Reading, non-words (/15)             | 14.67±.64  | 13.79±1.06  | <b>0.001</b>      | <b>1.00</b> |
|                                | Spelling, non-words (/6)             | 5.50±.59   | 4.96±1.04   | 0.032             | -           |

391 Table 2. Performance during the language assessment. Results represent mean±SD. Results that  
 392 are significant after Bonferroni-Holm correction are in bold. Cohen's d values were measured  
 393 for these variables only.

394

### 395 3.2.2. Connected-speech production

396 The AD group did not produce shorter narratives compared to healthy controls (number of  
 397 words AD group: 172±112; HC group: 146±84, p=0.4). However, they produced significantly  
 398 more self-corrections (AD group: 3.3±2.1; HC group: 1.7±1.5, p=0.006, Figure 1) and more  
 399 modalizing discourse (AD group: 12.1±11.5; HC group: 3.7±7.5, p=0.005) while performing  
 400 this task. Their lexical content was also lower than the control group (AD group: -0.82±0.8; HC  
 401 group: 0.19±0.8, p=0.0001, Figure 1). On the contrary, the two groups produced the same

402 proportion of repetitions (AD group:  $1.9 \pm 1.9$ ; HC group:  $1.2 \pm 0.9$ ,  $p=0.1$ ) and filled pauses (AD  
403 group:  $4.1 \pm 2.8$ ; HC group:  $3.5 \pm 2.9$ ,  $p=0.5$ ).

404

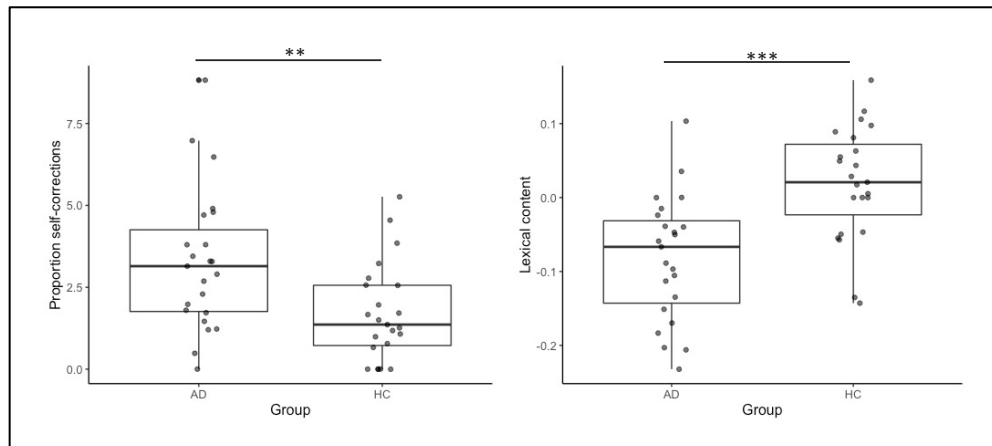

405

406 Figure 1. Inter-group comparisons for self-corrections (left) and lexical content (right) between  
407 AD participants (AD) and Healthy Control group (HC). \*\*  $p < 0.01$ ; \*\*\*  $p < 0.001$

408

409

### 410 3.3. Seed-based analyses

411

#### 412 3.3.1. Inferior frontal gyrus

413 At a group level, connectivity maps show that both groups have extended maps of fronto-  
414 temporal areas connected with the LIFG (Figure 2). They did not reveal any inter-group  
415 differences (threshold for second level maps  $p < 0.05$  FWE at the cluster level). Regions  
416 positively and negatively correlated with the LIFG in each group are detailed in the Appendix.

417

#### 418 3.3.2. Posterior temporal gyrus

419 Similar to the previous seed-based analysis, both groups had extended map areas connected  
420 with the LSTG (Figure 2). Two sample t-tests did not reveal any inter-group differences  
421 (threshold for second level maps  $p < 0.05$  FWE at the cluster level). Regions positively and  
422 negatively correlated with the LIFG in each group are detailed in the Appendix.

423



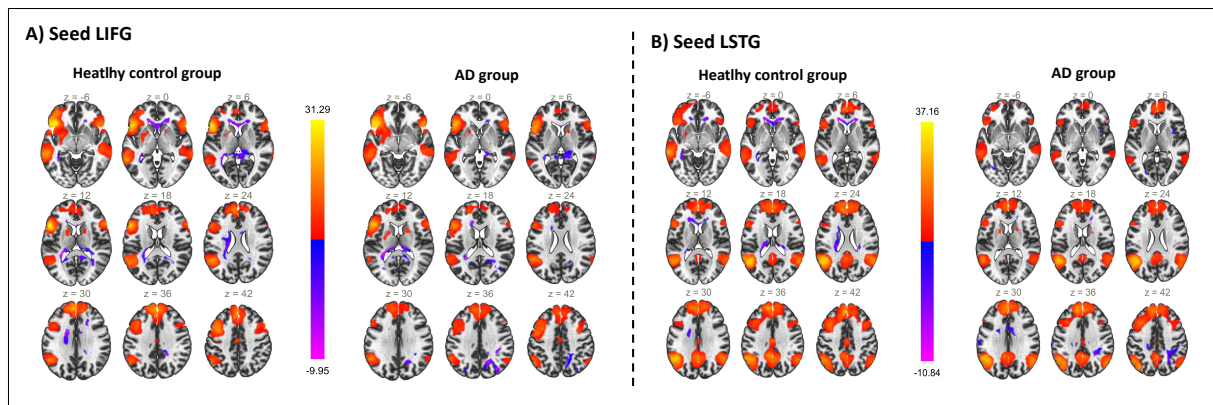

424  
 425 Figure 2. Cluster map for A) LIFG and B) LSTG in healthy controls and AD participants.  
 426 Yellow to red color for clusters positively correlated to LIFG activity; blue to pink color for  
 427 clusters negatively correlated to LIFG activity.

428  
 429 3.4. Within- and between-network connectivity

430 The average connectivity within the language network ( $t(46)=1.12, p=0.13$ ), within the Left  
 431 ECN network ( $t(46)=1.35, p=0.09$ ) and within the right ECN ( $t(46)=-0.77, p=0.78$ ) was not  
 432 significantly different between the two groups.

433 Additionally, the strength of connectivity between the language network and the left ECN  
 434 network ( $t(46)=1., p=0.46$ ) or between the language network and the right ECN network  
 435 ( $t(46)=0.53, p=0.3$ ) was not lower in the AD group.

436  
 437 3.5. Multivariate pattern analyses

438  
 439 3.5.1. Language network

440 For the language structural network, the classification analysis yielded an accuracy of 95.8%.  
 441 The permutation tests indicated that this classification was highly significant ( $p<0.0001$ ).  
 442 Furthermore, it indicated that the discriminative regions included the right inferior frontal  
 443 gyrus, the right superior temporal gyrus, the left middle temporal gyrus and the left middle  
 444 temporal gyrus/angular gyrus (Figure 3).

445

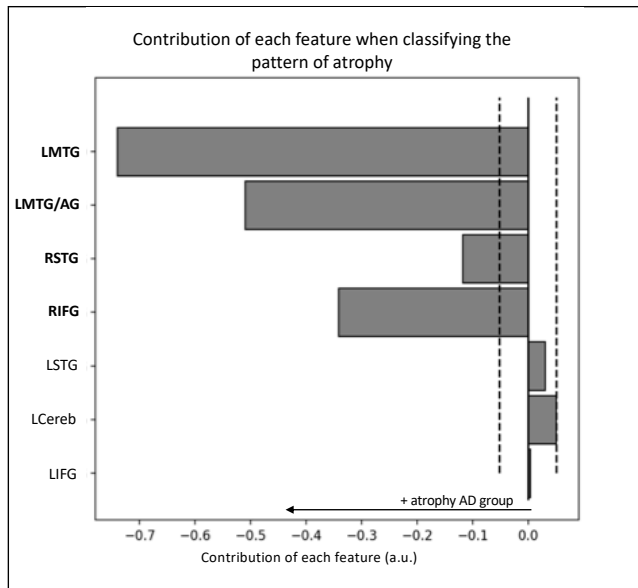

446

447 Figure 3. Contribution of each feature when classifying the pattern of atrophy within language  
 448 network. The dashed lines represent the threshold ( $p < 0.05$ ) for significance obtained through  
 449 permutations. Significant features are indicated in bold on the y-axis. Only the main area of  
 450 each ROI is displayed on the y-axis.

451 Abbreviations: LMTG: left middle temporal gyrus; LMTG/AG: left middle temporal/angular  
 452 gyrus; LSTG: left middle/superior/supramarginal gyrus; RSTG: right middle/superior/  
 453 supramarginal gyrus, LCereb: left cerebellum.

454

455 Regarding the language functional network, the classification analysis yielded an  
 456 accuracy of 64.5% ( $p < 0.05$ ). This pattern revealed a global increase in language functional  
 457 connectivity in the AD group compared to the control group (Figure 4). There were three  
 458 significantly discriminative connectivity features: the connectivity between the left inferior  
 459 frontal gyrus and the left middle temporal gyrus/angular gyrus, the connectivity between the  
 460 left inferior frontal gyrus and the left superior temporal gyrus and the connectivity between the  
 461 left middle temporal gyrus/angular gyrus and the left superior temporal gyrus.

462

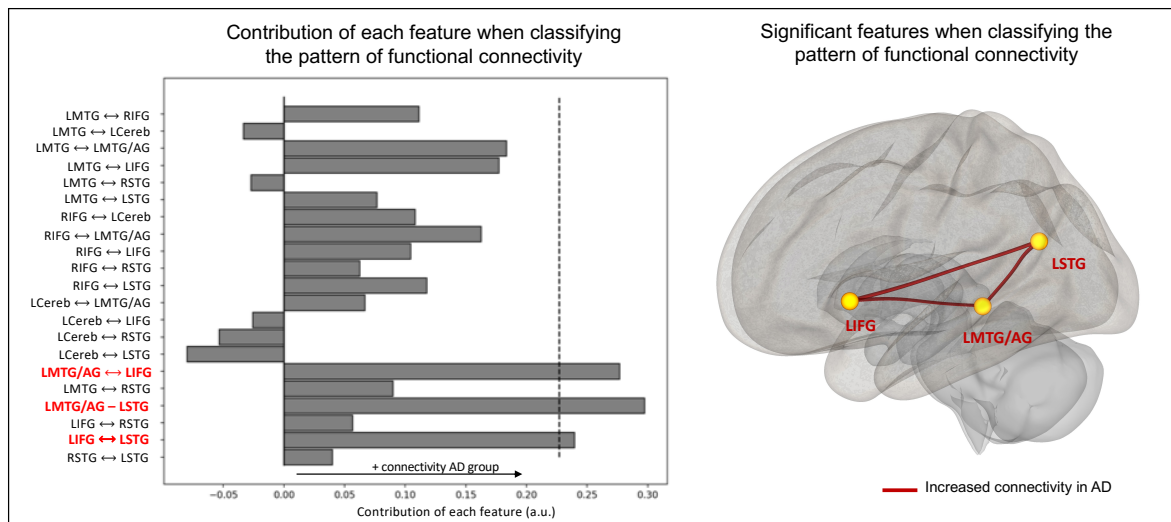

463

464 Figure 4. Contribution of each feature when classifying the pattern of functional connectivity  
 465 within the language network. The dashed lines represent the threshold for significance ( $p < 0.05$ )  
 466 obtained through permutations. Significant features are indicated in bold red on the y-axis. Only  
 467 the main area of each ROI is displayed on the y-axis.

468 Abbreviations: LMTG: left middle temporal gyrus; LMTG/AG: left middle temporal/angular  
 469 gyrus; LSTG: left middle/superior/supramarginal gyrus; RSTG: right middle/superior/  
 470 supramarginal gyrus, LCereb: left cerebellum.

471

### 472 3.5.2. Executive control networks

473 For the structural left ECN, the classification analysis yielded an accuracy of 95.8% ( $p < 0.0001$ ).  
 474 All the features of this network but one (left IFG/orbitofrontal gyrus) were significantly  
 475 informative for the classification. For the structural right ECN, the classification analysis  
 476 yielded an accuracy of 91.8% ( $p < 0.0001$ ). All the features of this network were significantly  
 477 informative for the classification.

478 Regarding these functional networks, neither of the two networks could significantly  
 479 discriminate AD participants from healthy controls (left ECN: 60.9%;  $p = 0.09$ ; right ECN: 44%;  
 480  $p = 0.7$ ).

481

### 482 3.5.3. Correlations with language performance

483 We extracted a measure of group-typicality from classification analyses to perform intra-group  
 484 correlations between discriminative patterns and language performance. For each participant,  
 485 we extracted the confidence score of the classifier to predict the class of this participant (HC or  
 486 AD). This score corresponds to the distance of each participant from the hyperplane that  
 487 distinguishes the two classes. For instance, a participant whose data represent a point far from

488 the classification hyperplane will have a high confidence score, indicating that they can  
489 confidently classified as a member of the class (depending on which side of the hyperplane they  
490 fall). On the other hand, a participant whose data represent a point close to the classification  
491 hyperplane will have a low confidence score, indicating that this participant's data were not  
492 very distinct from the other class. This measure therefore represents a continuous group-  
493 typicality measure that allow us to relate multivariate patterns analyses to behavioral  
494 performance (similarly to Ritchie and Carlson, 2016; Senoussi et al., 2016). For language  
495 performance, the most sensitive standardized language tasks (object naming, famous face  
496 naming, word spelling, written semantic verification, sentence spelling and text  
497 comprehension) and connected speech variables (lexical content, modalizing discourse, self-  
498 corrections) were chosen. Kendall correlations were performed, followed by Bonferroni-Holm  
499 corrections.

500 For the language structural network, confidence scores were not correlated with  
501 language performance, standardized tasks or the connected speech task in any group. For the  
502 language functional network, confidence scores were not correlated with any language task in  
503 the AD group. There was a positive correlation with the connected speech task in the HC group:  
504 participants with high confidence scores had superior lexical content during this task ( $p=0.015$ ;  
505  $r=0.36$ ). This means that participants that were the most different from the AD group in terms  
506 of language functional connectivity had richer lexical content during their narrative production.  
507 Confidence scores obtained during structural ECN classifications were not correlated with  
508 language performance in any group.

509

510

## 511 4. Discussion

512

513 In the current study, we recruited typical AD participants at the prodromal stage who underwent  
514 a comprehensive language assessment, a structural 3D-T1 MRI and a resting-state fMRI. We  
515 showed that AD participants had language impairment during standardized language tasks and  
516 connected speech production. Based on MVPA results, an increased functional connectivity  
517 within the language network could be a marker of early AD, despite gray matter loss. However,  
518 such differences were not noticeable during univariate analyses.

519

### 520 4.1. Behavioral level

521 The prodromal AD group had lower performance than HC during several lexical tasks: object  
522 naming, famous face naming, word spelling and written semantic verification. These results are  
523 coherent with previous literature that showed an early semantic and naming impairment in AD  
524 (e.g. Barbeau et al., 2012; Joubert et al., 2010). Contrary to what was expected, their verbal  
525 fluency was not lower than in HC (contrary to Mueller et al., 2016).

526 During connected-speech production, the two groups did not differ in terms of number  
527 of words. Additionally, and similarly to Mueller et al. (2016), the prodromal AD group did not  
528 produce more filled pauses than HC. However, we revealed three qualitative differences in AD  
529 participants' productions. First, their lexical content was lower than healthy controls, which is  
530 similar to what Pistono et al. (2019) found using the same narrative task. AD participants also  
531 produced more modalizing discourse and more self-corrections while speaking. Pistono et al.  
532 (2018) also found an increase of modalizing discourse in prodromal patients' narratives. As  
533 mentioned by Duong et al. (2003), the fact that patients produced modalizing discourse means  
534 that their pragmatic abilities are preserved and used to communicate about their productions. It  
535 is therefore possible that this variable increases in prodromal AD but decreases in later stages,  
536 when pragmatic and metacognitive processes are altered. Similarly, self-corrections can be seen  
537 as evidence that some abilities remain. Indeed, self-corrections are the result of a relatively late  
538 process of verbal self-monitoring. Verbal self-monitoring is a cognitive system that inspects  
539 the speech plan and overt speech and initiates corrections when necessary (Hartsuiker, 2014).  
540 In the current study, the AD participants exhibited more errors than the controls. However, they  
541 were able to correct themselves, while an impaired monitoring system would lead to  
542 uncorrected errors. The significant proportion of modalizing discourse and self-corrections  
543 therefore reflects the use of metacognitive abilities in prodromal AD patients' discourse  
544 production. In sum, in our sample, despite lexical difficulties, patients present with mostly  
545 preserved language/communicational abilities reflected by different compensation mechanisms  
546 during discourse production.

547

#### 548 4.2. Univariate analyses

549 No inter-group differences were found during seed-based analyses, both when using the LIFG  
550 or LSTG as a seed. This result is, however, unsurprising, given the early stage of AD  
551 participants that were recruited in the current study. Indeed, Montembeault et al. (2019)  
552 recruited AD participants with a slightly lower MMSE than AD participants in the current study  
553 ( $24.9 \pm 3.1$  in their study vs.  $25.5 \pm 2.6$  in the current study). They showed that only one cluster  
554 (the right posterior temporal gyrus) was significantly less connected to the left posterior

555 temporal gyrus in prodromal AD, while there was no difference with the control group when  
556 the LIFG was used a seed.

557 More surprisingly, connectivity between the language network and the executive  
558 control network was not lower in AD participants. Since this type of measure is the result of  
559 mean pairwise correlations between several ROIs, it is possible that it is too broad to reveal  
560 differences at a prodromal stage. Additionally, the AD group did not significantly differ from  
561 the HC group on fluency tasks during language assessment (i.e. not after corrections for  
562 multiple comparisons). Studies that revealed interactions with the executive control network in  
563 healthy aging suggested that older adults may rely on these additional attentional resources to  
564 maintain successful verbal fluency performance (Muller et al., 2016; Pistono et al., 2020). It is  
565 therefore also possible that prodromal patients do not differ from HC in the interaction of  
566 language and executive resources. However, although the two groups did not differ on any of  
567 these univariate measures, the pattern of atrophy or functional connectivity within the language  
568 network helped discriminate the two groups, as shown with multivariate analyses.

569

#### 570 4.3. Multivariate analyses

571 MVPA uses machine-learning algorithms that allow information patterns to be extracted from  
572 multi-dimensional data and the class of new data to be predicted. Here, we aimed to classify  
573 the two groups based on the pattern of atrophy and functional connectivity within the language  
574 network and the executive control networks. By doing so, we revealed two main findings. First,  
575 prodromal AD is not characterized by decreased language functional connectivity. Second,  
576 language network connectivity could better classify participants than executive control  
577 networks.

578 Regarding language networks, the pattern of atrophy was highly discriminative of AD  
579 participants from HC. However, this pattern was not correlated with language performance in  
580 any group. This discrepancy between atrophy and language performance has already been  
581 shown in the literature on healthy aging (Pistono et al., 2020). Additionally, while AD  
582 participants could be classified above chance based of their pattern of atrophy, the classifier  
583 was also able to discriminate them when examining their pattern of functional connectivity.  
584 However, this pattern revealed an overall increased connectivity between most language ROIs  
585 in the AD group. In other words, despite important gray matter loss, AD participants presented  
586 increased functional connectivity within language network. Taken individually, connectivity  
587 values between each ROI are not informative (i.e. not significantly different in univariate  
588 analyses); however, when all the information is considered, this global increase becomes

589 discriminant. This pattern could have been caused by the fact that AD participants were at the  
590 prodromal stage. Indeed, increased functional connectivity associated with gray matter loss has  
591 already been shown in the literature about subjective cognitive impairment (Hafkemeijer et al.,  
592 2013) or mild cognitive impairment (Gardini et al., 2015). Two explanations are developed in  
593 the current literature: either this type of mechanism could compensate for cognitive decline, or  
594 increased functional connectivity reflects a shift in network properties that may cause further  
595 brain damage (Gallagher et al., 2010). This pattern of connectivity was not correlated with  
596 language performance in the AD group, while in HC, the confidence score of each individual  
597 was correlated with higher lexical content during connected-speech production. This means that  
598 HC that presented a pattern of connectivity highly different from AD participants had superior  
599 lexical content in their narrative. On the contrary, increased functional connectivity in  
600 prodromal AD does not seem sufficient to maintain behavioral performance. However, future  
601 work is required to examine whether increased connectivity switches to decreased connectivity  
602 at a later stage of AD and how it relates to language decline.

603         The pattern of atrophy in the left and right ECN was highly discriminative of AD  
604 participants from HC. However, similarly to the language network, this pattern was not  
605 correlated with language performance in any group. Additionally, classification accuracies of  
606 AD participants and HC based on the functional connectivity within executive control networks  
607 were not significant. This suggests that despite significant atrophy, AD participants' functional  
608 connectivity patterns within the executive control networks were not different from HC.

609         Taken together, current findings show that language functional networks can better  
610 discriminate prodromal AD participants than executive control networks. More precisely,  
611 functional connectivity increased within AD participants' language network, in particular  
612 between three areas: left IFG, left STG and left MTG/AG. While the language network is  
613 usually understudied in AD compared to other networks, it could provide important insight at  
614 an early stage.

615

#### 616 4.4. Limitations

617 This study has 24 participants in each group, which is comparable to previous studies we  
618 mentioned earlier (e.g. Weiler et al., 2014), but represent a rather small sample size. Further  
619 studies are therefore required to examine structural and functional language network changes  
620 in prodromal AD and to reinforce current findings. Although we adapted our methods to the  
621 current sample size (e.g. using feature selection and cross-validations during MVPA), further  
622 research on large samples of participants could combine multiple modalities (e.g. language task

623 performance, gray matter, functional connectivity) into a single multivariate pattern  
624 classification analysis. Moreover, as mentioned earlier, it would be interesting to replicate  
625 current methods on larger longitudinal data to uncover how the patterns we observed evolve  
626 over the course of AD.

627         Additionally, we did not use a functional language task to control that participants were  
628 left hemisphere dominant or to define our ROIs. Although we exclusively included right-  
629 handed participants, we cannot be sure that their language was left lateralized. Similarly, the  
630 use of a predefined atlas might have influenced the results. Nonetheless, we decided to use an  
631 atlas that was functionally defined, since these are more likely to represent brain regions  
632 effectively involved in language processing than anatomical seeds (Muller et al., 2014).

633

#### 634 4.5. Conclusions

635 The current study demonstrated that prodromal participants present with language alterations,  
636 both when examining standardized language tasks and connected-speech production. It also  
637 showed that, when analyzing language functional networks, multivariate pattern analyses could  
638 significantly predict the group membership of prodromal patients and HC, while univariate  
639 analyses were not able to discriminate participants at this stage. This method therefore  
640 represents a useful tool for investigating the functional and structural (re-)organization of the  
641 neural bases of language in various populations.

642

643

#### 644 Data and code availability statement

645 Because of privacy issues regarding clinical data, neuroimaging data, raw language scores and  
646 discourse transcripts will be made available from the corresponding author upon reasonable  
647 request.

648

#### 649 Acknowledgments

650 This study was supported by a grant from the Occitania Region and the Toulouse Mind and  
651 Brain Institute to MJ (TellMA project grant number: 15050480). We would like to thank the  
652 Inserm/UPS UMR1214 Technical Platform for the MRI acquisitions. The authors would also  
653 like to thank the patients and control participants who participated in the study, as well as the  
654 promoter of the study, Toulouse University Hospital (CHU). There are no conflicts of interest  
655 to report.



656

657

## 658 References

659 Agniel, A., Joannette, Y., Doyon, B., Duchéin, C., 1992. Protocole Montréal-Toulouse :

660 Évaluation des gnosies visuelles et auditives. Paris.

661 Ahmed, S., Haigh, A.F., Jager, C.A. De, Garrard, P., 2013. Connected speech as a marker of  
662 disease progression in autopsy-proven Alzheimer ' s disease. *Brain*.

663 <https://doi.org/10.1093/brain/awt269>

664 Baddeley, A.D., Emslie, H., Nimmo-Smith, I., Company, T.V.T., 1994. *Doors and People: A*

665 *Test of Visual and Verbal Recall and Recognition. Manual. Thames Valley Test*

666 *Company.*

667 Barbeau, E.J., Didic, M., Joubert, S., Guedj, E., Koric, L., Felician, O., Ranjeva, J.P.,

668 Cozzone, P., Ceccaldi, M., 2012. Extent and neural basis of semantic memory

669 impairment in mild cognitive impairment. *J. Alzheimer's Dis.* 28, 823–837.

670 <https://doi.org/10.3233/JAD-2011-110989>

671 Beck, A.T., Ward, C.H., Mendelson, M., Mock, J., Erbaugh, J., 1961. An inventory for

672 measuring depression. *Arch. Gen. Psychiatry* 4, 561–71.

673 Bézy, C., Renard, A., Pariente, J., 2016. GREMOTS Batterie d'évaluation des troubles du  
674 langage dans les maladies neurodégénératives. De Boeck supérieur.

675 de Lira, J.O., Ortiz, K.Z., Campanha, A.C., Bertolucci, P.H.F., Minett, T.S.C., 2011.

676 Microlinguistic aspects of the oral narrative in patients with Alzheimer's disease. *Int*

677 *Psychogeriatr* 23. <https://doi.org/10.1017/S1041610210001092>

678 Duong, A., Tardif, A., Ska, B., 2003. Discourse about discourse: What is it and how does it

679 progress in Alzheimer's disease? *Brain Cogn.* 53, 177–180.

680 [https://doi.org/10.1016/S0278-2626\(03\)00104-0](https://doi.org/10.1016/S0278-2626(03)00104-0)

681 Gallagher, M., Bakker, A., Yassa, M.A., Stark, C.E.L., 2010. Bridging neurocognitive aging

682 and disease modification: targeting functional mechanisms of memory impairment. *Curr.*

683 *Alzheimer Res.* 7, 197–199. <https://doi.org/10.2174/156720510791050867>

684 Gardini, S., Venneri, A., Sambataro, F., Cuetos, F., Fasano, F., Marchi, M., Crisi, G.,

685 Caffarra, P., 2015. Increased functional connectivity in the default mode network in mild

686 cognitive impairment: a maladaptive compensatory mechanism associated with poor

687 semantic memory performance. *J. Alzheimers. Dis.* 45, 457–470.

688 <https://doi.org/10.3233/JAD-142547>

689 Hafkemeijer, A., Altmann-Schneider, I., Oleksik, A.M., Van De Wiel, L., Middelkoop,

690 H.A.M., Van Buchem, M.A., Van Der Grond, J., Rombouts, S.A.R.B., 2013. Increased  
691 functional connectivity and brain atrophy in elderly with subjective memory complaints.  
692 *Brain Connect.* 3, 353–362. <https://doi.org/10.1089/brain.2013.0144>

693 Hartsuiker, R., 2014. Monitoring and control of the production system. *Oxford Handb. Lang.*  
694 *Prod.* 417–436.

695 Haynes, J.-D., Rees, G., 2006. Decoding mental states from brain activity in humans. *Nat.*  
696 *Rev. Neurosci.* 7, 523–534. <https://doi.org/10.1038/nrn1931>

697 Hebart, M.N., Baker, C.I., 2018. Deconstructing multivariate decoding for the study of brain  
698 function. *Neuroimage* 180, 4–18. <https://doi.org/10.1016/j.neuroimage.2017.08.005>

699 Hoffman, P., Morcom, A.M., 2018. Age-related changes in the neural networks supporting  
700 semantic cognition: A meta-analysis of 47 functional neuroimaging studies. *Neurosci.*  
701 *Biobehav. Rev.* 84, 134–150. <https://doi.org/10.1016/j.neubiorev.2017.11.010>

702 Joubert, S., Brambati, S.M., Ansado, J., Barbeau, E.J., Felician, O., Didic, M., Lacombe, J.,  
703 Goldstein, R., Chayer, C., Kergoat, M.-J., 2010. The cognitive and neural expression of  
704 semantic memory impairment in mild cognitive impairment and early Alzheimer’s  
705 disease. *Neuropsychologia* 48, 978–88.  
706 <https://doi.org/10.1016/j.neuropsychologia.2009.11.019>

707 Kemper, S., LaBarge, E., Farraro, R., Cheung, H., Storandt, M., 1993. On the preservation of  
708 syntax in Alzheimer’s disease. *Arch. Neurol.* 50, 81–86.  
709 <https://doi.org/10.1001/archneur.1993.00540010075021>

710 Liu, T., Wang, Y., Yan, T., 2018. Classification by a Rs-fMRI Study. 2018 11th Int. Congr.  
711 *Image Signal Process. Biomed. Eng. Informatics* 1–6.

712 Mahieux-Laurent, F., Fabre, C., Galbrun, E., Dubrulle, A., Moroni, C., 2008. Validation  
713 d’une batterie brève d’évaluation des praxies gestuelles pour consultation Mémoire.  
714 Évaluation chez 419 témoins, 127 patients atteints de troubles cognitifs légers et 320  
715 patients atteints d’une démence. *Rev. Neurol. (Paris)*. 1519, 511 YP – 611.  
716 <https://doi.org/http://dx.doi.org/10.1016/j.neurol.2008.11.016>

717 Mascali, D., Dinuzzo, M., Serra, L., Mangia, S., Maraviglia, B., 2018. Disruption of Semantic  
718 Network in Mild Alzheimer’s Disease Revealed by Resting-State fMRI. *Neuroscience*  
719 371, 38–48. <https://doi.org/10.1016/j.neuroscience.2017.11.030>

720 Melrose, R.J., Campa, O.M., Harwood, D.G., Osato, S., Mandelkern, M.A., Sultzer, D.L.,  
721 2009. The neural correlates of naming and fluency deficits in Alzheimer’s disease: an  
722 FDG-PET study. *Int. J. Geriatr. Psychiatry* 24, 885–893.  
723 <https://doi.org/10.1002/gps.2229>

724 Montembeault, M., Chapleau, M., Jarret, J., Boukadi, M., Laforce, R., Wilson, M.A.,  
725 Rouleau, I., Brambati, S.M., 2019. Differential language network functional connectivity  
726 alterations in Alzheimer's disease and the semantic variant of primary progressive  
727 aphasia. *Cortex* 117, 284–298. <https://doi.org/10.1016/j.cortex.2019.03.018>

728 Mueller, K.D., Kosciak, R.L., Turkstra, L.S., Riedeman, S.K., LaRue, A., Clark, L.R.,  
729 Hermann, B., Sager, M.A., Johnson, S.C., 2016. Connected Language in Late Middle-  
730 Aged Adults at Risk for Alzheimer's Disease. *J. Alzheimer's Dis.* 54, 1539–1550.  
731 <https://doi.org/10.3233/jad-160252>

732 Muller, A.M., Mérillat, S., Jäncke, L., 2016. Older but still fluent? Insights from the  
733 intrinsically active baseline configuration of the aging brain using a data driven graph-  
734 theoretical approach. *Neuroimage* 127, 346–362.  
735 <https://doi.org/10.1016/j.neuroimage.2015.12.027>

736 Muller, A.M., Meyer, M., 2014. Language in the brain at rest: new insights from resting state  
737 data and graph theoretical analysis. *Front. Hum. Neurosci.* 8, 228.  
738 <https://doi.org/10.3389/fnhum.2014.00228>

739 Pedregosa, F., Varoquaux, G., Gramfort, A., Michel, V., Thirion, B., Grisel, O., Blondel, M.,  
740 Prettenhofer, P., Weiss, R., Dubourg, V., et al., 2011. Scikit-Learn: Machine Learning in  
741 Python. *J. Mach. Learn. Res.* 12, 2825–2830.

742 Pereira, F., Mitchell, T., Botvinick, M., 2009. Machine learning classifiers and fMRI: a  
743 tutorial overview. *Neuroimage* 45. <https://doi.org/10.1016/j.neuroimage.2008.11.007>

744 Pistono, A., Guerrier, L., Péran, P., Rafiq, M., Gimeno, M., Bézy, C., Pariente, J., Jucla, M.,  
745 2020. Increased functional connectivity supports language performance in healthy aging  
746 despite grey matter loss. *Neurobiol. Aging*.  
747 <https://doi.org/https://doi.org/10.1016/j.neurobiolaging.2020.09.015>

748 Pistono, A., Jucla, M., Pariente, J., 2018. Discourse macrolinguistic impairment as a marker  
749 of linguistic and extralinguistic functions decline in early Alzheimer's disease,  
750 *International Journal of Language & Communication Disorders*.  
751 <https://doi.org/10.1111/1460-6984.12444>

752 Pistono, A., Pariente, J., Bézy, C., Lemesle, B., Le Men, J., Jucla, M., 2019. What happens  
753 when nothing happens? An investigation of pauses as a compensatory mechanism in  
754 early Alzheimer's disease. *Neuropsychologia* 124, 133–143.  
755 <https://doi.org/10.1016/J.NEUROPSYCHOLOGIA.2018.12.018>

756 Reitan, R.M., 1958. Validity of the Trail Making Test as an indicator of organic brain  
757 damage. *Percept. Mot. Skills* 8, 271–276. <https://doi.org/10.2466/PMS.8.7.271-276>

758 Ritchie, J.B., Carlson, T.A., 2016. Neural Decoding and “Inner” Psychophysics: A Distance-  
759 to-Bound Approach for Linking Mind, Brain, and Behavior. *Front. Neurosci.* 10, 190.  
760 <https://doi.org/10.3389/fnins.2016.00190>

761 Senoussi, M., Berry, I., VanRullen, R., Reddy, L., 2016. Multivoxel Object Representations  
762 in Adult Human Visual Cortex Are Flexible: An Associative Learning Study. *J. Cogn.*  
763 *Neurosci.* 28, 852–868. [https://doi.org/10.1162/jocn\\_a\\_00933](https://doi.org/10.1162/jocn_a_00933)

764 Shirer, W.R., Ryali, S., Rykhlevskaia, E., Menon, V., Greicius, M.D., 2012. Decoding  
765 subject-driven cognitive states with whole-brain connectivity patterns. *Cereb. Cortex* 22,  
766 158–165. <https://doi.org/10.1093/cercor/bhr099>

767 Starkstein, S.E., Mayberg, H.S., Preziosi, T.J., Andrezejewski, P., Leiguarda, R., Robinson,  
768 R.G., 1992. Reliability, validity, and clinical correlates of apathy in Parkinson’s disease.  
769 *J. Neuropsychiatry Clin. Neurosci.* 4, 134–9. <https://doi.org/10.1176/jnp.4.2.134>

770 Taler, V., Phillips, N.A., 2008. Language performance in Alzheimer’s disease and mild  
771 cognitive impairment: a comparative review. *J. Clin. Exp. Neuropsychol.* 30, 501–556.  
772 <https://doi.org/10.1080/13803390701550128>

773 Wechsler, D., 1997. *WAIS-III: Administration and Scoring Manual*. The Psychological  
774 Corporation, San Antonio:

775 Weiler, M., Fukuda, A., Massabki, L., Lopes, T., Franco, A., Damasceno, B., Cendes, F.,  
776 Balthazar, M., 2014. Default Mode, Executive Function, and Language Functional  
777 Connectivity Networks are Compromised in Mild Alzheimer’s Disease. *Curr. Alzheimer*  
778 *Res.* 11, 274–282. <https://doi.org/10.2174/1567205011666140131114716>

779 Whitfield-Gabrieli, S., Nieto-Castanon, A., 2012. Conn: A Functional Connectivity Toolbox  
780 for Correlated and Anticorrelated Brain Networks. *Brain Connect.* 2, 125–141.  
781 <https://doi.org/10.1089/brain.2012.0073>

782  
783

784 Appendix 1. Regions showing less density of grey matter in AD participants in comparison to  
 785 healthy controls. The statistical threshold is pFWE-corr<0.05 (k>50 voxels)

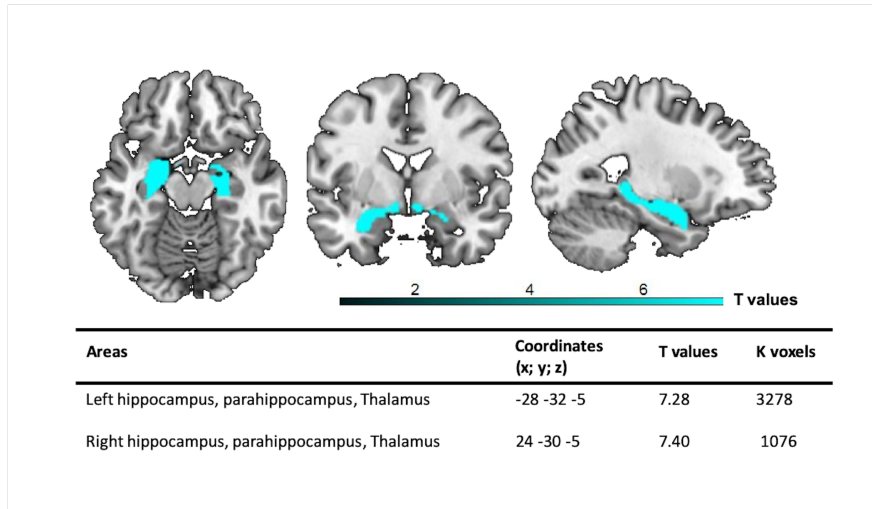

786

787

788 Appendix 2. Summary of regions positively and negatively correlated with the seeds in each  
 789 group. Abbreviations: PCC = Posterior cingulate gyrus; SMG = Supramarginal gyrus; AG =  
 790 Angular gyrus; TP = Temporal pole; ITG = Inferior temporal gyrus; MTG= Middle temporal  
 791 gyrus; SPL= Superior parietal lobule.

792

| Cluster                                                                                                                                                                             | Functional connectivity | K voxels | Peak in MNI coordinates (x, y, z) | T value |
|-------------------------------------------------------------------------------------------------------------------------------------------------------------------------------------|-------------------------|----------|-----------------------------------|---------|
| <b>Seed IFG</b>                                                                                                                                                                     |                         |          |                                   |         |
| <b>AD group</b>                                                                                                                                                                     |                         |          |                                   |         |
| Left and right frontal regions (i.e. frontal poles, middle and superior frontal gyri, inferior frontal gyri). Left lateral occipital cortex, SMG, AG, SPL, ITG. Right TP, precuneus | positive                | 24,565   | -48 +26 -06                       | 21.35   |
| Right lateral occipital cortex, SMG, AG                                                                                                                                             | positive                | 3,786    | +50 +20 -16                       | 13.03   |
| Right ITG, MTG, STG                                                                                                                                                                 | positive                | 1,269    | +52 -32 -08                       | 8       |
| Right cerebellum                                                                                                                                                                    | positive                | 1,418    | +24 -86 -46                       | 7.96    |
| Left cerebellum                                                                                                                                                                     | positive                | 673      | -34 -34 -36                       | -10.14  |
| Precuneus and posterior cingulate                                                                                                                                                   | negative                | 2,144    | +16 -60 +34                       | -10.82  |

|                                                                                                                                                                                     |          |        |             |        |
|-------------------------------------------------------------------------------------------------------------------------------------------------------------------------------------|----------|--------|-------------|--------|
| Left and right superior parietal lobules, Right lateral occipital cortex                                                                                                            | negative | 457    | -04 -56 +58 | -5.82  |
| Right cerebellum                                                                                                                                                                    | negative | 341    | +14 -56 -62 | -8.89  |
| Left cerebellum                                                                                                                                                                     | negative | 335    | -26 -80 -42 | 6.91   |
| <b>Older group</b>                                                                                                                                                                  |          |        |             |        |
| Left and right frontal regions (i.e. frontal poles, middle and superior frontal gyri, inferior frontal gyri). Left lateral occipital cortex, SMG, AG, SPL, ITG. Right TP, precuneus | positive | 41,598 | -42 +24 +24 | 18.82  |
| Right lateral occipital cortex, SMG, AG                                                                                                                                             | positive | 2,752  | +42 -44 +44 | 8.68   |
| Right ITG, MTG                                                                                                                                                                      | positive | 1,050  | +60 -38 -18 | 6.94   |
| Right cerebellum                                                                                                                                                                    | positive | 2,367  | +32 -70 -52 | 9.22   |
| Left cerebellum                                                                                                                                                                     | positive | 396    | -24 -78 -52 | 6.92   |
| Left hippocampus, caudate and temporal fusiform cortex                                                                                                                              | negative | 4,587  | -04 +06 +20 | -5.18  |
| Right hippocampus, thalamus, parahippocampal gyrus, PCC                                                                                                                             | negative | 2,275  | +36 -38 +18 | -9.24  |
| Left cerebellum                                                                                                                                                                     | negative | 870    | -08 -26 -54 | -10.34 |

793

| <b>Cluster</b>                                                                                                                                                                                | <b>Functional connectivity</b> | <b>K voxels</b> | <b>Peak in MNI coordinates (x, y, z)</b> | <b>T value</b> |
|-----------------------------------------------------------------------------------------------------------------------------------------------------------------------------------------------|--------------------------------|-----------------|------------------------------------------|----------------|
| <b>Seed STG</b>                                                                                                                                                                               |                                |                 |                                          |                |
| <b>AD group</b>                                                                                                                                                                               |                                |                 |                                          |                |
| Left frontal regions (i.e. frontal pole, middle and superior frontal gyri, inferior frontal gyri) and temporoparietal regions (i.e. TP, ITG, MTG, SMG, AG, lateral occipital cortex and SPL). | positive                       | 26,454          | -44 -58 +24                              | 22.6           |

|                                                                                                                                                                                               |          |        |             |       |
|-----------------------------------------------------------------------------------------------------------------------------------------------------------------------------------------------|----------|--------|-------------|-------|
| Right regions mentioned in the cluster above                                                                                                                                                  | positive | 7,705  | +52 -64 +32 | 14.07 |
| Right cerebellum                                                                                                                                                                              | positive | 2,281  | +20 -78 -34 | 10.96 |
| Left cerebellum                                                                                                                                                                               | positive | 1,392  | -24 -76 -32 | 10.13 |
| Precuneus and posterior cingulate                                                                                                                                                             | negative | 4,343  | -10 -50 +30 | 8.51  |
| Right superior parietal lobule, SMG, lateral occipital cortex                                                                                                                                 | negative | 1,463  | +28 -42 +34 | -6.32 |
| <b>Older group</b>                                                                                                                                                                            |          |        |             |       |
| Left frontal regions (i.e. frontal pole, middle and superior frontal gyri, inferior frontal gyri) and temporoparietal regions (i.e. TP, ITG, MTG, SMG, AG, lateral occipital cortex and SPL). | positive | 31,472 | -54 -56 +26 | 19.71 |
| Right regions mentioned in the cluster above                                                                                                                                                  | positive | 10,411 | +56 -54 +26 | 18.41 |
| Right cerebellum                                                                                                                                                                              | positive | 2,928  | +24 -80 -42 | 11.11 |
| Left cerebellum                                                                                                                                                                               | positive | 868    | -20 -80 -30 | 7.86  |
| Precuneus and posterior cingulate                                                                                                                                                             | negative | 4,343  | -08 -48 +36 | 9.89  |
| Right Superior parietal lobule, SMG, lateral occipital cortex                                                                                                                                 | negative | 289    | +46 -36 +62 | -6.05 |
| Left cerebellum                                                                                                                                                                               | negative | 238    | -16 -44 -54 | -7.23 |
